# Supplementary material for: A silver metal complex as a luminescent probe for enzymatic sensing of glucose in blood plasma and urine
Source: Royal Society of Chemistry journal article supplement (doi:10.1039/c8dt00500a), 2018-01-01
Supplement: c8dt00500a5.pdf [file c8dt00500a5.pdf]

## Supporting Information

### **Silver Metal Complex as a Luminescent Probe for Enzymatic Sensing of Blood Plasma Glucose and Urine**

Zheng-Bang Pan,<sup>a</sup> Ying-Chu Wang,<sup>a</sup> Gomathy Chakkaradhari,<sup>b</sup> Jian Fan Zhu,<sup>a</sup> Rong-Yu He,<sup>a</sup> Yu-Ci Liu,<sup>a</sup> Chia-Hui Hsu,<sup>a</sup> Igor O. Koshevoy,<sup>\*,b</sup> Pi-Tai Chou,<sup>\*,c</sup> Sheng-Wei Pan,<sup>d,e,f</sup> and Mei-Lin Ho<sup>\*,a</sup>

<sup>\*a</sup> Department of Chemistry, Soochow University, No 70, LinShih Rd., Shih-Lin, Taipei 11102, Taiwan. Fax: +886-2-28811053; Tel: +886-2-28819471 ext 6827; E-mail: meilin\_ho@scu.edu.tw

<sup>\*b</sup> University of Eastern Finland, Department of Chemistry, 80101, Joensuu, Finland

<sup>\*c</sup> National Taiwan University, Department of Chemistry, Taipei 106, Taiwan

<sup>d</sup> Department of Chest Medicine, Taipei Veterans General Hospital, Taipei, Taiwan

<sup>e</sup> School of Medicine, National Yang-Ming University, Taipei, Taiwan

<sup>f</sup> Institute of Public Health, National Yang-Ming University, Taipei, Taiwan

**Supplementary materials:**

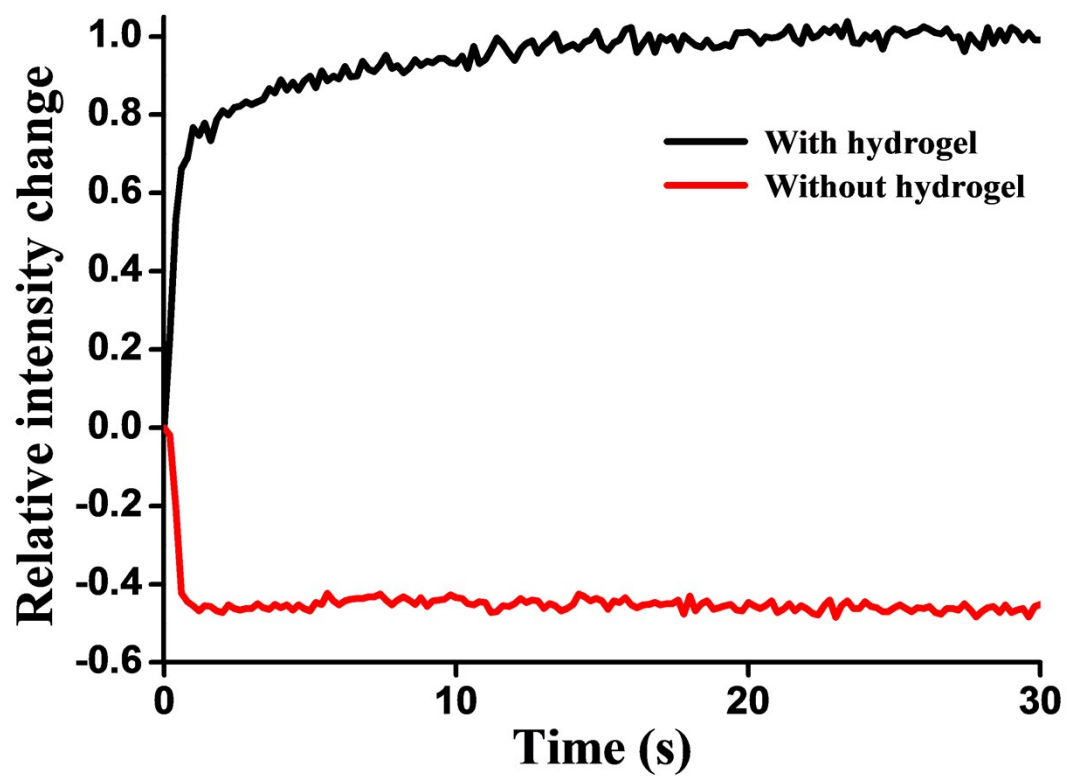

**Figure S1.** The photoresponse of complex **Ag3** for detecting glucose in air and in solution.

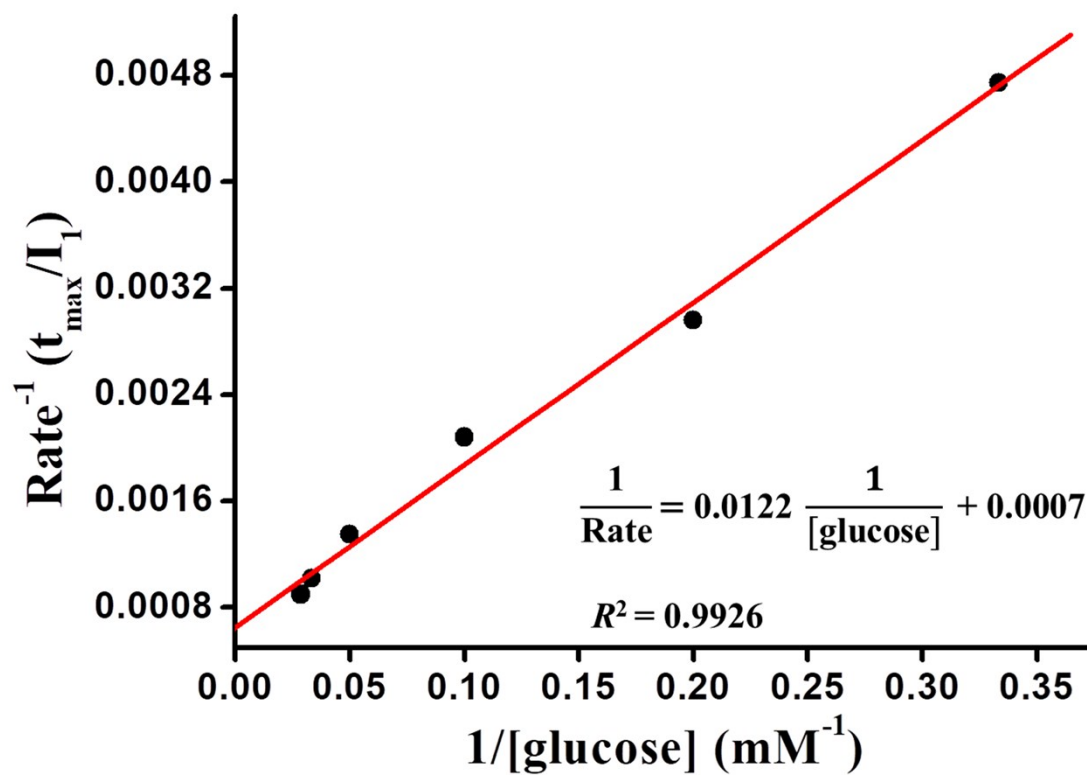

**Figure S2.** The Lineweaver–Burk plot of the reciprocal of the Michaelis–Menten equation.

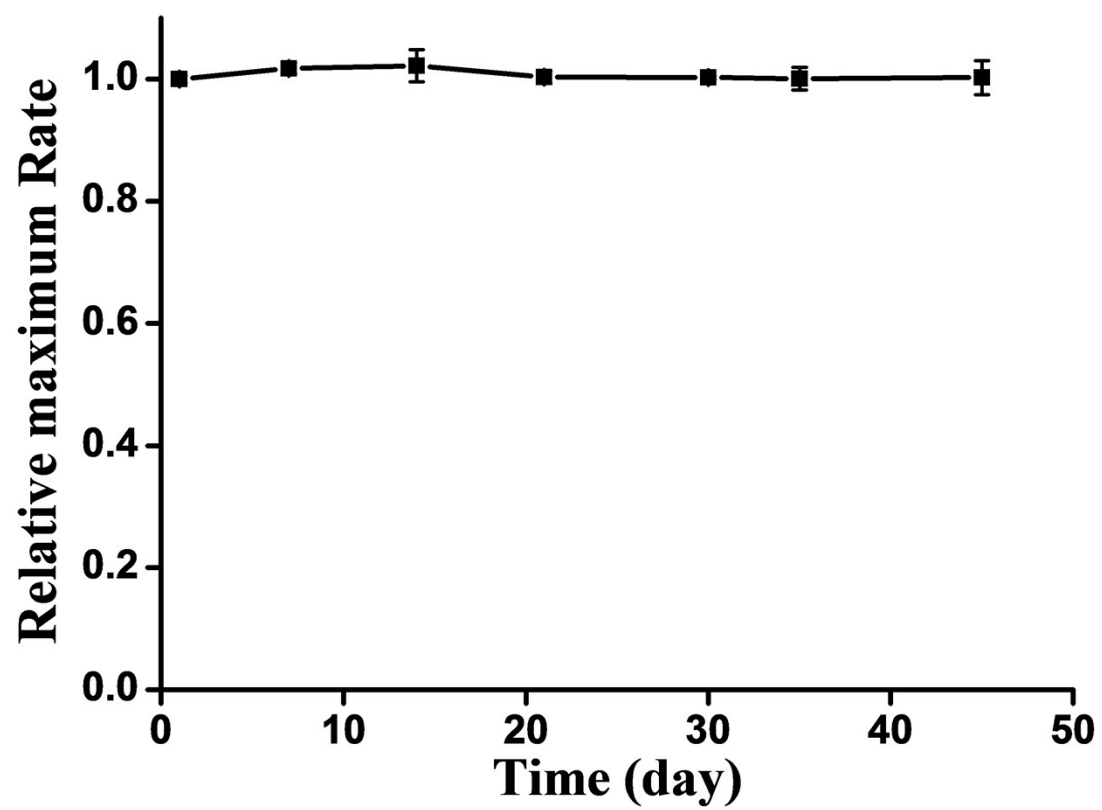

**Figure S3.** Storage stability of the paper-based biosensor.
