# Supplementary figures and images for: A silver metal complex as a luminescent probe for enzymatic sensing of glucose in blood plasma and urine
Source: Royal Society of Chemistry journal article supplement (doi:10.1039/c8dt00500a), 2018-01-01

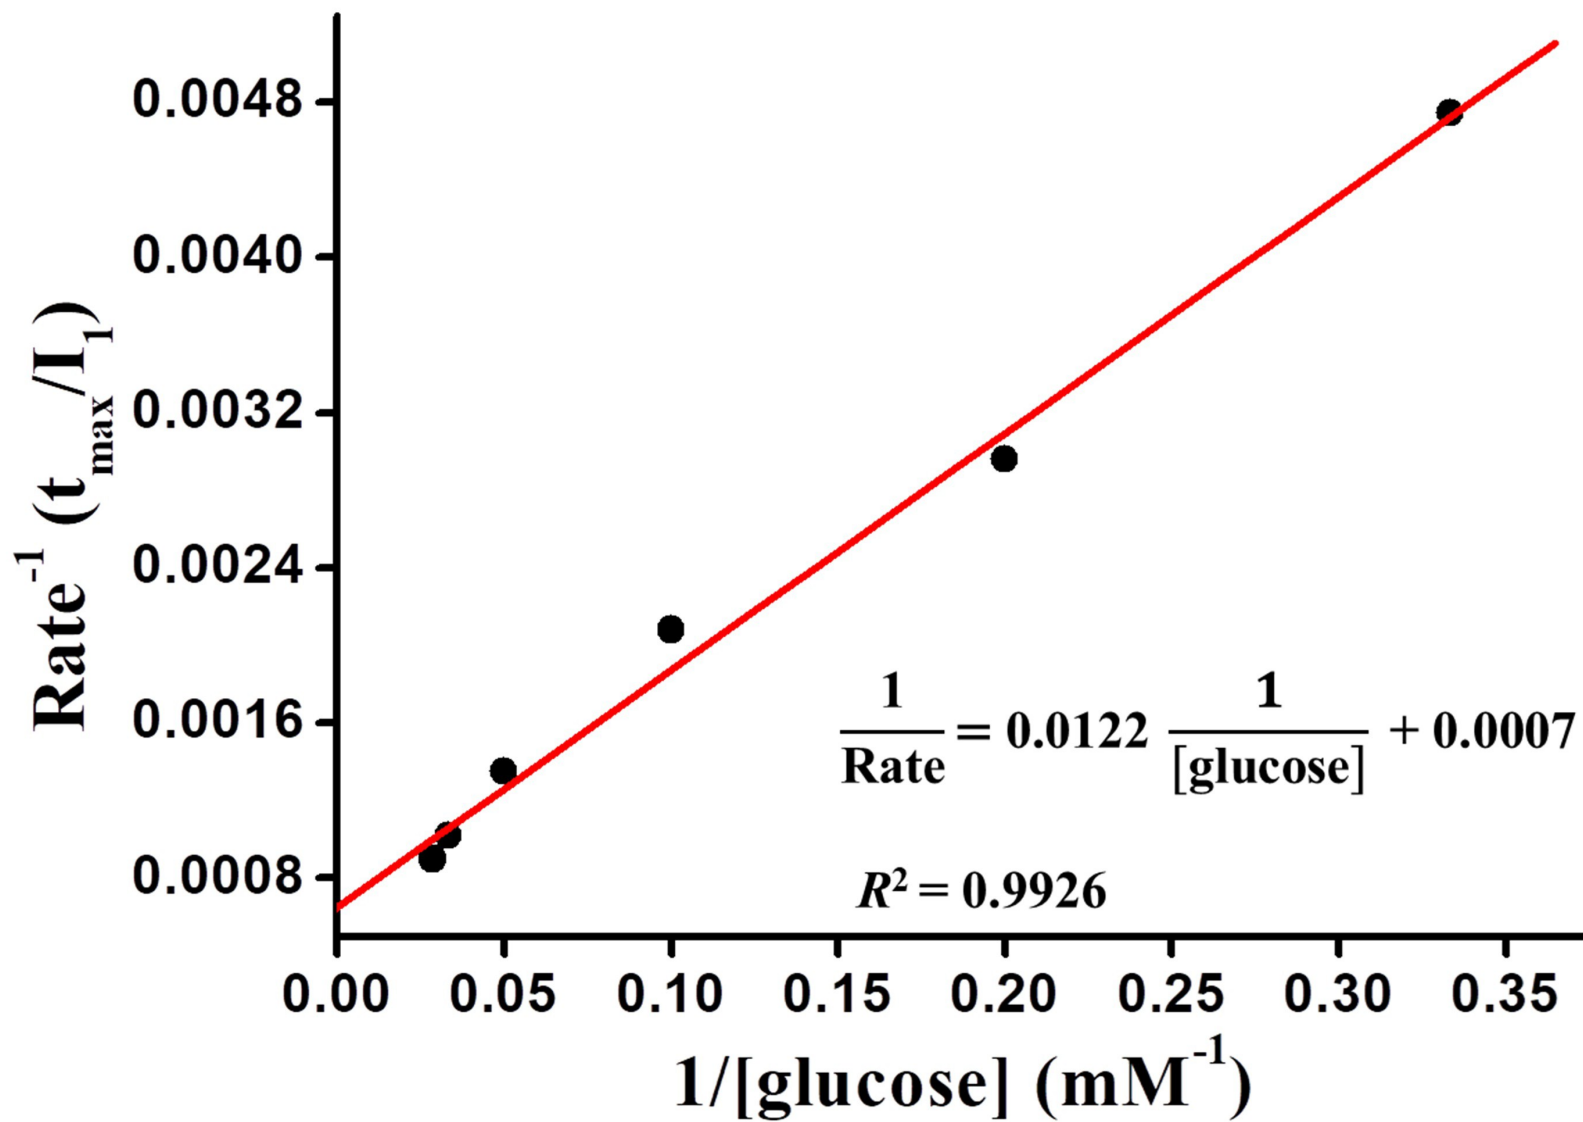

Supplement: c8dt00500a2.pdf [file c8dt00500a2.pdf]

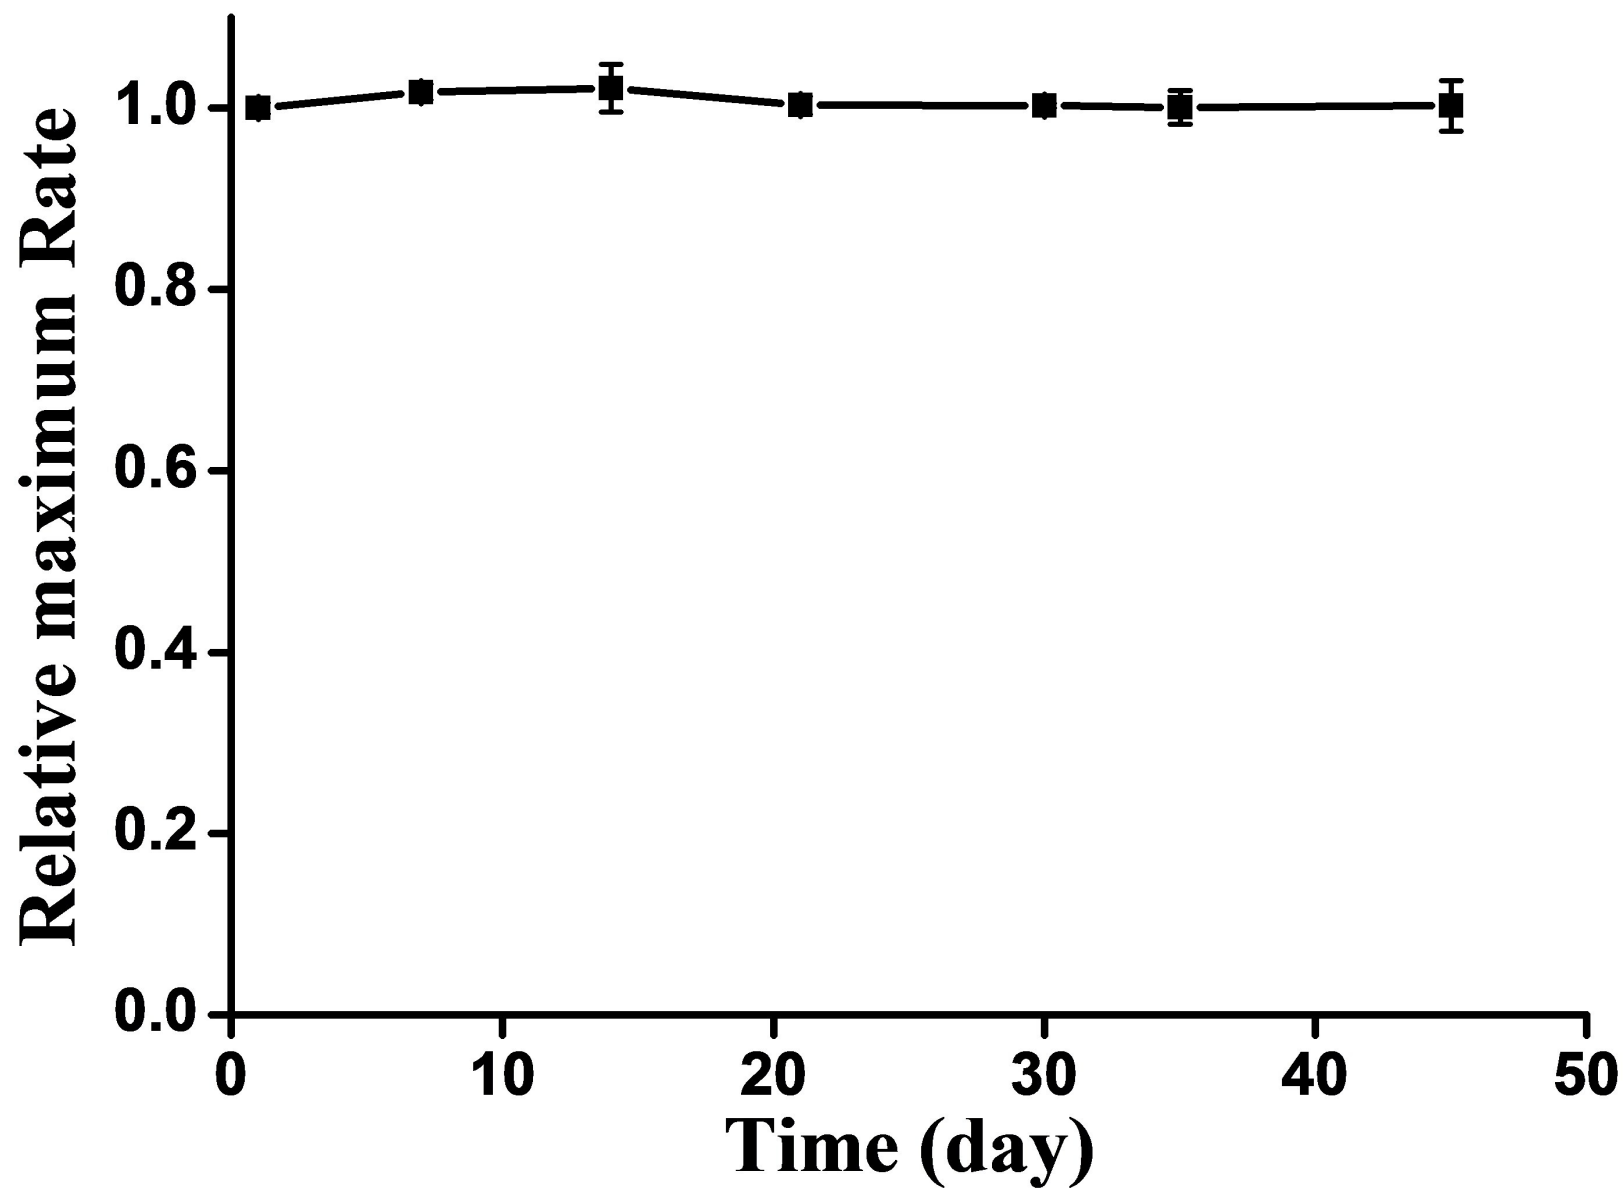

Supplement: c8dt00500a3.pdf [file c8dt00500a3.pdf]

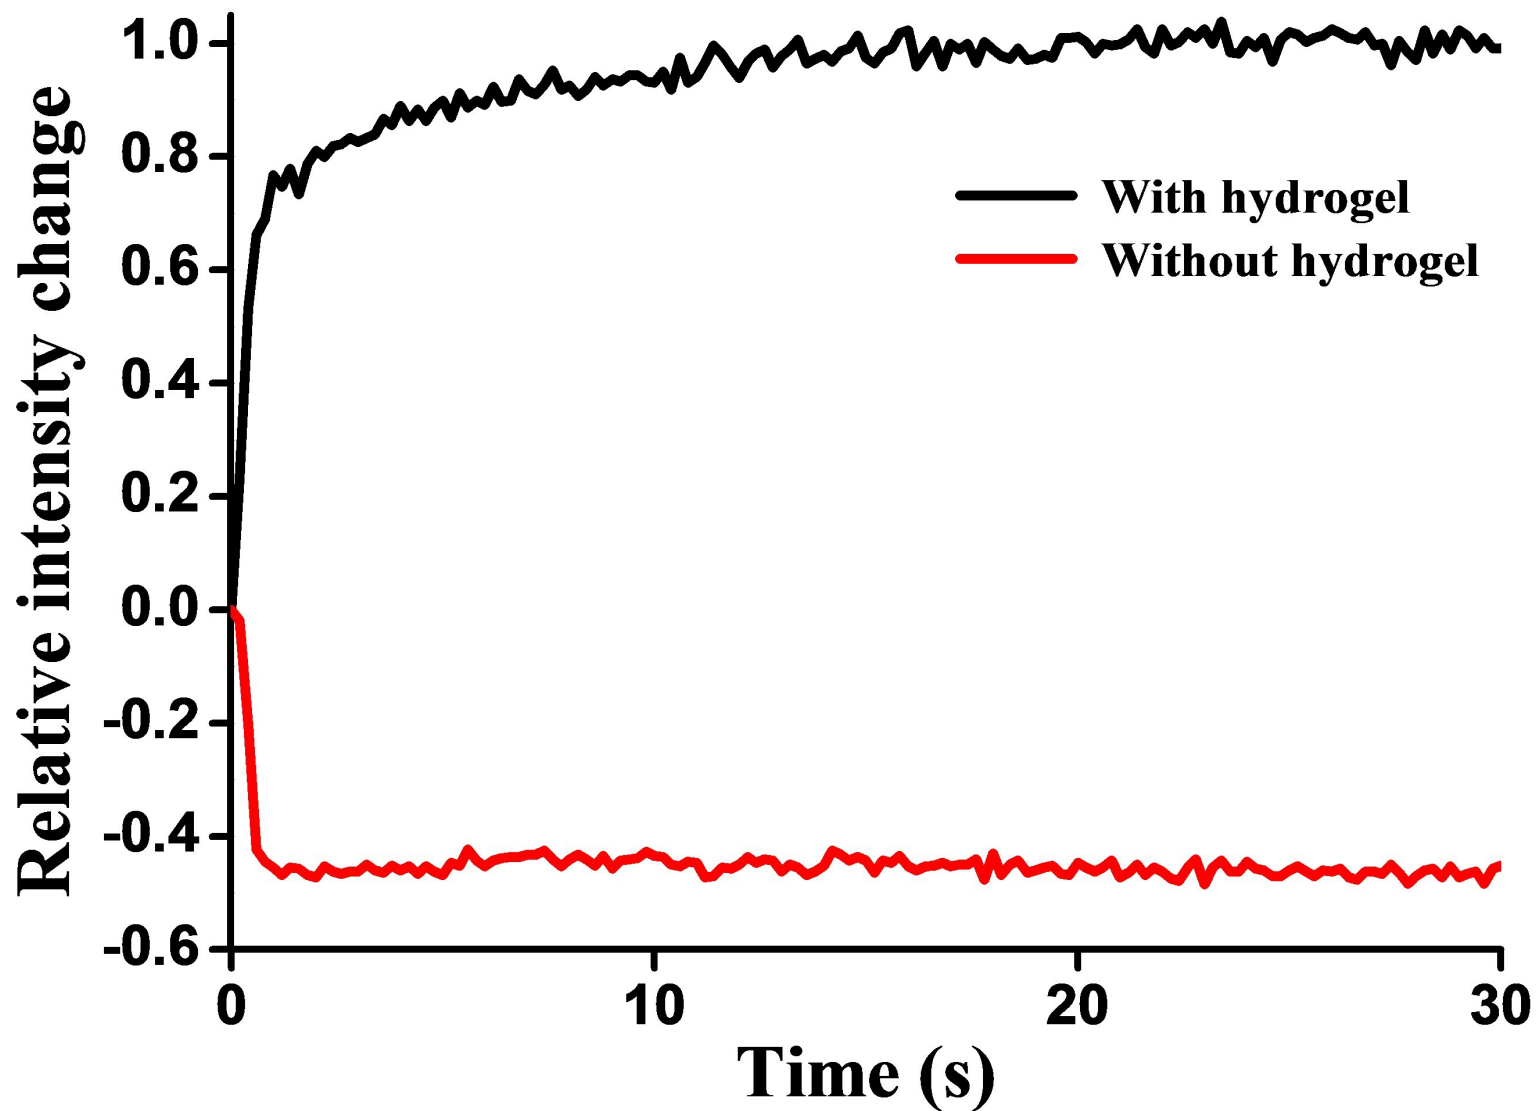

Supplement: c8dt00500a4.pdf [file c8dt00500a4.pdf]
